# Supplementary material for: Antibiotic use during pregnancy and childhood overweight: A population-based nationwide cohort study
Source: PubMed Central journal article supplement (PMC6687733; doi:10.1038/s41598-019-48065-9), 2019-08-08
Supplement: 41598_2019_48065_MOESM1_ESM.pdf [file 41598_2019_48065_MOESM1_ESM.pdf]

## **Supplementary Material**

### **Antibiotic use during pregnancy and childhood overweight: A population-based nationwide cohort study**

Tine Jess, Camilla S Morgen, Maria C Harpsøe, Thorkild IA Sørensen, Teresa A Ajslev, Julie C Antvorskov, Kristine H Allin

**Supplementary Figure 1.** Flow chart describing the sampling of the study population

**Supplementary Table 1.** Categorization of antibiotics into narrow- and broad-spectrum antibiotics

**Supplementary Table 2.** Characteristics of the population according to whether childhood BMI information was available

**Supplementary Table 3.** Use of antibiotics in the study population

**Supplementary Table 4.** Characteristics of the study population according to number of antibiotic courses during pregnancy

**Supplementary Table 5.** Effects of adjustment for individual covariates included in the multivariable-adjusted model

**Supplementary Table 6.** Association between antibiotics during pregnancy and obesity in childhood

**Supplementary Table 7.** Odds of overweight at age seven years according to exposure to antibiotics with and without childhood antibiotics in the model

**Supplementary Table 8.** Characteristics of the study population according to whether information on BMI was available at age 11 years

**Supplementary Figure 1. Flow chart describing the sampling of the study population**

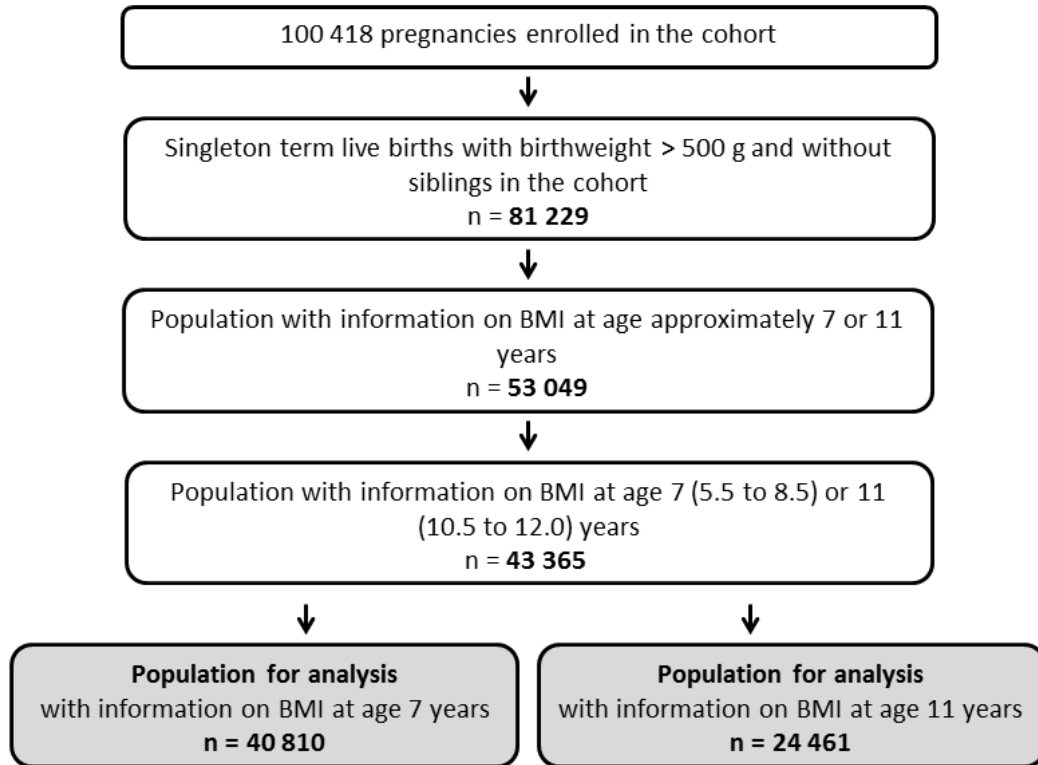

Age- and sex-specific BMI z-scores and overweight at age seven and 11 years were used as outcomes in the study. At age seven years, these were defined for children with BMI measured at age 5.0 to 8.5 years. To avoid influences of puberty at age 11 years, age- and sex-specific BMI z-scores and overweight at age 11 years were defined for children with BMI measured at age 10.5 to 12.0 years.

**Supplementary Table 1. Categorization of antibiotics into narrow- and broad-spectrum antibiotics**

| <b>ATC code</b> | <b>Name</b>                       | <b>Narrow- or broad-spectrum</b> |
|-----------------|-----------------------------------|----------------------------------|
| J01CA08         | Pivmecillinam                     | Narrow                           |
| J01CE02         | Phenoxymethylpenicillin           | Narrow                           |
| J01CE09         | Procaine benzylpenicillin         | Narrow                           |
| J01CF01         | Dicloxacillin                     | Narrow                           |
| J01FA01         | Erythromycin                      | Narrow                           |
| J01FA02         | Spiramycin                        | Narrow                           |
| J01CF05         | Flucloxacillin                    | Narrow                           |
| J01FA06         | Roxithromycin                     | Narrow                           |
| J01FA09         | Clarithromycin                    | Narrow                           |
| J01FA10         | Azithromycin                      | Narrow                           |
| J01FF01         | Clindamycin                       | Narrow                           |
| J01CA01         | Ampicillin                        | Broad                            |
| J01CA02         | Pivampicillin                     | Broad                            |
| J01CA04         | Amoxicillin                       | Broad                            |
| J01CA06         | Bacampicillin                     | Broad                            |
| J01CR02         | Amoxicillin and enzyme inhibitor  | Broad                            |
| J01EA01         | Trimethoprim                      | Broad                            |
| J01EB02         | Sulfamethizole                    | Broad                            |
| J01EE01         | Sulfamethoxazole and trimethoprim | Broad                            |

**Supplementary Table 2. Characteristics of the population according to whether childhood BMI information was available**

|                                                     | BMI information at age seven and/or 11 years         |                                              | <i>P</i> value            |        |
|-----------------------------------------------------|------------------------------------------------------|----------------------------------------------|---------------------------|--------|
|                                                     | Not available / not included in the study (n=37 864) | Available / included in the study (n=43 365) |                           |        |
|                                                     | <b>n</b>                                             | <b>Mean ± SD or n (%)</b>                    | <b>Mean ± SD or n (%)</b> |        |
| <b>Antibiotics during pregnancy, n (%)</b>          | 81,229                                               | 10,327 (27.3)                                | 10,748 (24.8)             | <0.001 |
| <b>Maternal age at birth, years</b>                 | 81,229                                               | 29.6 ± 4.4                                   | 30.2 ± 4.2                | <0.001 |
| <b>Maternal pre-pregnancy BMI, kg/m<sup>2</sup></b> | 74,734                                               | 23.8 ± 4.5                                   | 23.4 ± 4.0                | <0.001 |
| <b>Maternal diabetes, n (%)</b>                     | 74,370                                               | 337 (1.0)                                    | 374 (0.9)                 | 0.04   |
| <b>Smoking in pregnancy</b>                         | 75,810                                               |                                              |                           | <0.001 |
| Non-smokers                                         |                                                      | 24,022 (70.2)                                | 31,845 (76.6)             |        |
| 1-10 cigarettes per day                             |                                                      | 7568 (22.1)                                  | 7573 (18.2)               |        |
| >10 cigarettes per day                              |                                                      | 2637 (7.7)                                   | 2165 (5.2)                |        |
| <b>Parity ≥ 1, n (%)</b>                            | 75,961                                               | 17,252 (50.3)                                | 20,978 (50.4)             | 0.88   |
| <b>Family education/occupational class, n (%)</b>   | 72,030                                               |                                              |                           | <0.001 |
| Highest level                                       |                                                      | 20,862 (64.6)                                | 28,027 (70.5)             |        |
| Middle level                                        |                                                      | 10,118 (31.3)                                | 10,684 (26.9)             |        |
| Lowest level                                        |                                                      | 1311 (4.1)                                   | 1028 (2.6)                |        |
| <b>Gestational age at birth, days</b>               | 81,229                                               | 281.6 ± 9.0                                  | 281.9 ± 8.9               | <0.001 |
| <b>Child gender, girls, n (%)</b>                   | 81,228                                               | 18,586 (49.1)                                | 21,212 (48.9)             | 0.62   |
| <b>Weekly gestational weight gain, kg</b>           | 60,942                                               | 0.38 ± 0.2                                   | 0.38 ± 0.1                | 0.004  |
| <b>Paternal BMI, kg/m<sup>2</sup></b>               | 54,816                                               | 25.3 ± 3.2                                   | 25.1 ± 3.1                | <0.001 |
| <b>Birth weight, kg</b>                             | 81,229                                               | 3.6 ± 0.5                                    | 3.6 ± 0.5                 | <.0001 |
| <b>Cesarean section, n (%)</b>                      | 81,102                                               | 5576 (14.8)                                  | 6005 (13.9)               | <0.001 |
| <b>Breastfeeding, n (%)</b>                         | 52,080                                               |                                              |                           | <0.001 |
| 0.0-19.9 weeks                                      |                                                      | 7552 (34.9)                                  | 7991 (26.3)               |        |
| 20.0-31.9 weeks                                     |                                                      | 3767 (17.4)                                  | 5521 (18.1)               |        |
| 32.0-39.9 weeks                                     |                                                      | 4289 (19.8)                                  | 7009 (23.0)               |        |
| 40.0-95.0 weeks                                     |                                                      | 6936 (27.9)                                  | 9915 (32.6)               |        |

**Supplementary Table 3. Use of antibiotics in the study population**

|                                                  | No. (%) <sup>a</sup> |
|--------------------------------------------------|----------------------|
| <b>No. of antibiotics courses</b>                |                      |
| 0                                                | 32,617 (75.2)        |
| 1                                                | 8106 (18.7)          |
| 2                                                | 1923 (4.4)           |
| ≥3                                               | 719 (1.7)            |
| <b>Use of antibiotics according to trimester</b> |                      |
| First trimester                                  | 3916 (10.7)          |
| Second trimester                                 | 4683 (12.6)          |
| Third trimester                                  | 4314 (11.7)          |
| <b>Type of antibiotics</b>                       |                      |
| Penicillins; beta-lactam antibacterials (J01C)   | 7969 (19.6)          |
| Sulfonamides and trimethoprim (J01E)             | 1571 (4.6)           |
| Macrolides, lincosamides & streptogramins (J01F) | 931 (2.8)            |

<sup>a</sup>Numbers in parentheses are % of the total study population.

**Supplementary Table 4. Characteristics of the study population according to number of antibiotic courses during pregnancy**

|                                                     | Number of antibiotics courses |                    |                    |                    | <i>P</i> value |
|-----------------------------------------------------|-------------------------------|--------------------|--------------------|--------------------|----------------|
|                                                     | 0                             | 1                  | 2                  | ≥3                 |                |
|                                                     | Mean ± SD or n (%)            | Mean ± SD or n (%) | Mean ± SD or n (%) | Mean ± SD or n (%) |                |
| <b>Maternal age at birth, years</b>                 | 30.2 ± 4.2                    | 30.2 ± 4.3         | 30.0 ± 4.4         | 30.1 ± 4.4         | 0.05           |
| <b>Maternal pre-pregnancy BMI, kg/m<sup>2</sup></b> | 23.3 ± 3.9                    | 23.6 ± 4.2         | 24.0 ± 4.6         | 24.7 ± 5.0         | <0.001         |
| <b>Maternal diabetes, n (%)</b>                     | 254 (0.8)                     | 84 (1.1)           | 21 (1.1)           | 15 (2.2)           | 0.001          |
| <b>Smoking in pregnancy</b>                         |                               |                    |                    |                    | <0.001         |
| Non-smokers                                         | 24,332 (77.8)                 | 5740 (73.9)        | 1309 (71.7)        | 464 (66.6)         |                |
| 1-10 cigarettes per day                             | 5487 (17.5)                   | 1544 (19.9)        | 379 (20.7)         | 163 (23.4)         |                |
| >10 cigarettes per day                              | 1468 (4.7)                    | 488 (6.3)          | 139 (7.6)          | 70 (10.0)          |                |
| <b>Parity ≥ 1, n (%)</b>                            | 15,292 (48.8)                 | 4247 (54.5)        | 1016 (55.5)        | 423 (60.5)         | <0.001         |
| <b>Family education/occupational class, n (%)</b>   |                               |                    |                    |                    | <0.001         |
| Highest level                                       | 21,465 (71.7)                 | 5047 (68.1)        | 1148 (65.8)        | 367 (56.4)         |                |
| Middle level                                        | 7786 (26.0)                   | 2118 (28.6)        | 525 (30.1)         | 255 (39.2)         |                |
| Lowest level                                        | 684 (2.3)                     | 243 (3.3)          | 72 (4.1)           | 29 (4.5)           |                |
| <b>Gestational age at birth, days</b>               | 281.9 ± 8.8                   | 282.0 ± 8.9        | 281.6 ± 9.0        | 281.8 ± 9.4        | 0.42           |
| <b>Child gender, girls, n (%)</b>                   | 15,983 (49.0)                 | 3980 (49.1)        | 921 (47.9)         | 328 (45.6)         | 0.25           |
| <b>Weekly gestational weight gain, kg</b>           | 0.4 ± 0.1                     | 0.4 ± 0.1          | 0.4 ± 0.1          | 0.4 ± 0.2          | 0.03           |
| <b>Paternal BMI, kg/m<sup>2</sup></b>               | 25.0 ± 3.1                    | 25.2 ± 3.1         | 25.3 ± 3.2         | 25.2 ± 3.2         | <0.001         |
| <b>Birth weight, kg</b>                             | 3.6 ± 0.5                     | 3.6 ± 0.5          | 3.6 ± 0.5          | 3.7 ± 0.5          | 0.34           |
| <b>Cesarean section, n (%)</b>                      | 4516 (13.9)                   | 1111 (13.7)        | 277 (14.4)         | 101 (14.1)         | 0.88           |
| <b>Breastfeeding, n (%)</b>                         |                               |                    |                    |                    | <0.001         |
| 0.0-19.9 weeks                                      | 5665 (24.7)                   | 1693 (30.1)        | 457 (34.6)         | 176 (35.2)         |                |
| 20.0-31.9 weeks                                     | 4196 (18.3)                   | 993 (17.6)         | 233 (17.6)         | 99 (19.8)          |                |
| 32.0-39.9 weeks                                     | 5421 (23.6)                   | 1249 (22.2)        | 254 (19.2)         | 85 (17.0)          |                |
| 40.0-95.0 weeks                                     | 7702 (33.5)                   | 1696 (30.1)        | 377 (28.5)         | 140 (28.0)         |                |

**Supplementary Table 5. Effects of adjustment for individual covariates included in the multivariable adjusted model**

|                                      | <b>OR (95% CI)</b> |
|--------------------------------------|--------------------|
| <b>Overweight at age seven years</b> |                    |
| Unadjusted                           | 1.20 (1.11-1.30)   |
| Univariable adjustment for           |                    |
| Maternal age at birth                | 1.20 (1.11-1.30)   |
| Maternal pre-pregnancy BMI           | 1.11 (1.03-1.21)   |
| Maternal diabetes                    | 1.20 (1.11-1.30)   |
| Smoking in pregnancy                 | 1.17 (1.08-1.26)   |
| Parity                               | 1.19 (1.10-1.28)   |
| Family education/occupational class  | 1.17 (1.08-1.27)   |
| Gestational age at birth             | 1.20 (1.11-1.30)   |
| Child gender                         | 1.20 (1.11-1.30)   |
| <b>Overweight at age 11 years</b>    |                    |
| Unadjusted                           | 1.27 (1.14-1.41)   |
| Univariable adjustment for           |                    |
| Maternal age at birth                | 1.27 (1.14-1.41)   |
| Maternal pre-pregnancy BMI           | 1.12 (1.00-1.25)   |
| Maternal diabetes                    | 1.26 (1.14-1.40)   |
| Smoking in pregnancy                 | 1.23 (1.10-1.37)   |
| Parity                               | 1.25 (1.13-1.39)   |
| Family education/occupational class  | 1.25 (1.12-1.39)   |
| Gestational age at birth             | 1.27 (1.14-1.41)   |
| Child gender                         | 1.27 (1.14-1.41)   |

**Supplementary Table 6. Association between antibiotics during pregnancy and obesity in childhood**

|                      | <b>OR (95% CI)</b> | <b>P value</b> |
|----------------------|--------------------|----------------|
| <b>Seven years</b>   |                    |                |
| Unadjusted           | 1.39 (1.15-1.68)   | <0.001         |
| Multifactor-adjusted | 1.13 (0.93-1.38)   | 0.21           |
| <b>11 years</b>      |                    |                |
| Unadjusted           | 1.56 (1.13-2.17)   | <0.001         |
| Multifactor-adjusted | 1.06 (0.75-1.50)   | 0.75           |



**Supplementary Table 7. Odds of overweight at age seven years according to exposure to antibiotics with and without childhood antibiotics in the model**

|                                       | n      | Multivariable-adjusted |                | Multivariable-adjusted,<br>including childhood antibiotics |                |
|---------------------------------------|--------|------------------------|----------------|------------------------------------------------------------|----------------|
|                                       |        | OR (95% CI)            | <i>P</i> value | OR (95% CI)                                                | <i>P</i> value |
| <b>Overweight at age seven years</b>  |        |                        |                |                                                            |                |
| Narrow- or broad-spectrum antibiotics |        |                        |                |                                                            |                |
| No antibiotics                        | 27,606 | 1                      |                | 1                                                          |                |
| Broad-spectrum antibiotics            | 3067   | 1.20 (1.07-1.36)       | 0.002          | 1.20 (1.06-1.35)                                           | 0.003          |
| Type of broad-spectrum antibiotics    |        |                        |                |                                                            |                |
| No antibiotics                        | 27,606 | 1                      |                | 1                                                          |                |
| Ampicillin                            | 1094   | 1.27 (1.05-1.53)       | 0.01           | 1.27 (1.05-1.53)                                           | 0.001          |
| Amoxicillin                           | 574    | 1.56 (1.23-1.97)       | <0.001         | 1.55 (1.22-1.97)                                           | <0.001         |

Childhood antibiotics were defined as exposure to antibiotics within the first 6 months of life.

**Supplementary Table 8. Characteristics of the study population according to whether information on BMI was available at age 11 years**

|                                                     | BMI information                      |                                  | <i>P</i> value     |        |
|-----------------------------------------------------|--------------------------------------|----------------------------------|--------------------|--------|
|                                                     | Not available at 11 years (n=18 904) | Available at 11 years (n=24 461) |                    |        |
|                                                     | n                                    | Mean ± SD or n (%)               | Mean ± SD or n (%) |        |
| <b>Maternal age at birth, years</b>                 | 43,365                               | 30.0 ± 4.2                       | 30.4 ± 4.2         | <0.001 |
| <b>Maternal pre-pregnancy BMI, kg/m<sup>2</sup></b> | 41,057                               | 23.5 ± 4.2                       | 23.3 ± 3.9         | <0.001 |
| <b>Maternal diabetes, n (%)</b>                     | 41,871                               | 197 (1.1)                        | 177 (0.8)          | 0.002  |
| <b>Smoking in pregnancy</b>                         | 41,583                               |                                  |                    | <0.001 |
| Non-smokers                                         |                                      | 13,315 (73.5)                    | 18,530 (79.0)      |        |
| 1-10 cigarettes per day                             |                                      | 3706 (20.4)                      | 3867 (16.5)        |        |
| >10 cigarettes per day                              |                                      | 1107 (6.1)                       | 1058 (4.5)         |        |
| <b>Parity ≥ 1, n (%)</b>                            | 41,662                               | 9496 (52.3)                      | 11,482 (48.9)      | <0.001 |
| <b>Family education/occupational class, n (%)</b>   | 39,739                               |                                  |                    | <0.001 |
| Highest level                                       |                                      | 11,530 (66.6)                    | 16,497 (73.6)      |        |
| Middle level                                        |                                      | 5208 (30.1)                      | 5476 (24.4)        |        |
| Lowest level                                        |                                      | 571 (3.3)                        | 457 (2.0)          |        |
| <b>Gestational age at birth, days</b>               | 43,365                               | 281.9 ± 8.9                      | 281.9 ± 8.9        | 0.96   |
| <b>Child gender, girls, n (%)</b>                   | 43,365                               | 8931 (47.2)                      | 12,281 (50.2)      | <0.001 |
| <b>Weekly gestational weight gain, kg</b>           | 34,994                               | 0.38 ± 0.1                       | 0.37 ± 0.1         | 0.002  |
| <b>Paternal BMI, kg/m<sup>2</sup></b>               | 32,999                               | 25.1 ± 3.1                       | 25.0 ± 3.1         | 0.002  |
| <b>Birth weight, kg</b>                             | 43,365                               | 3.6 ± 0.5                        | 3.6 ± 0.5          | 0.95   |
| <b>Cesarean section, n (%)</b>                      | 43,365                               | 2665 (13.6)                      | 3440 (14.1)        | 0.14   |
| <b>Breastfeeding, n (%)</b>                         | 30,436                               |                                  |                    | <0.001 |
| 0.0-19.9 weeks                                      |                                      | 3667 (29.1)                      | 4324 (24.3)        |        |
| 20.0-31.9 weeks                                     |                                      | 2316 (18.4)                      | 3205 (18.0)        |        |
| 32.0-39.9 weeks                                     |                                      | 2719 (21.6)                      | 4290 (24.1)        |        |
| 40.0-95.0 weeks                                     |                                      | 3907 (31.0)                      | 6008 (33.7)        |        |
